# Supplementary material
Source: publisher figshare collection journal article supplement (https://gsajournals.figshare.com/articles/dataset/_/6241922)
Supplement: Supplementary file 1 [file 1]

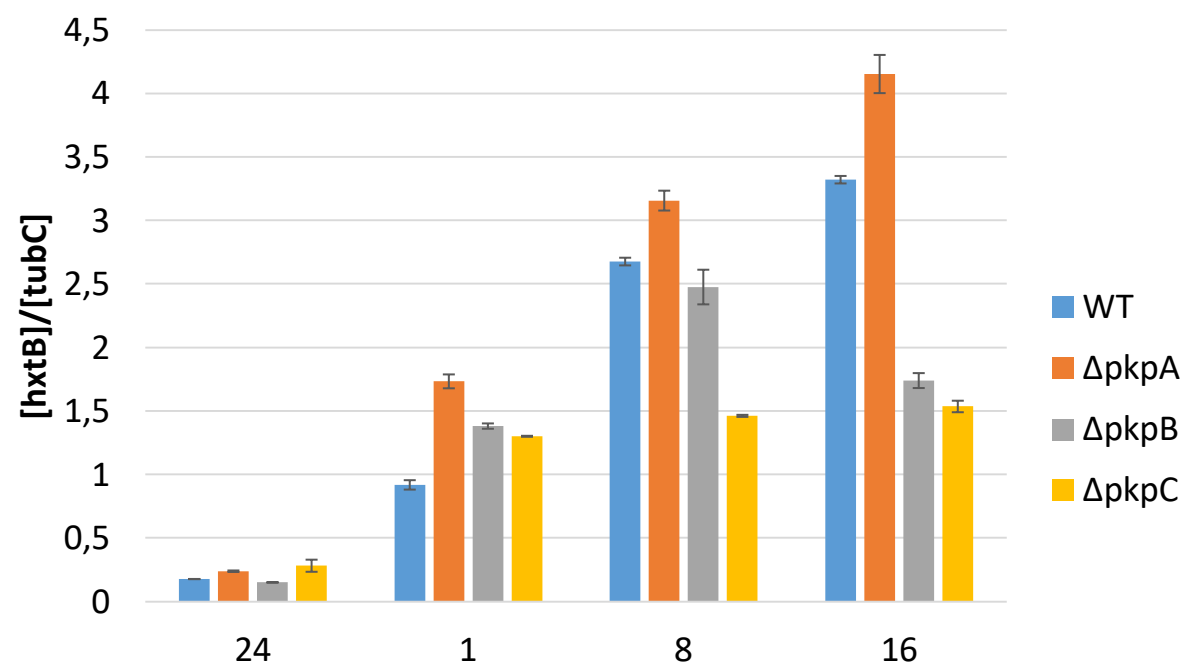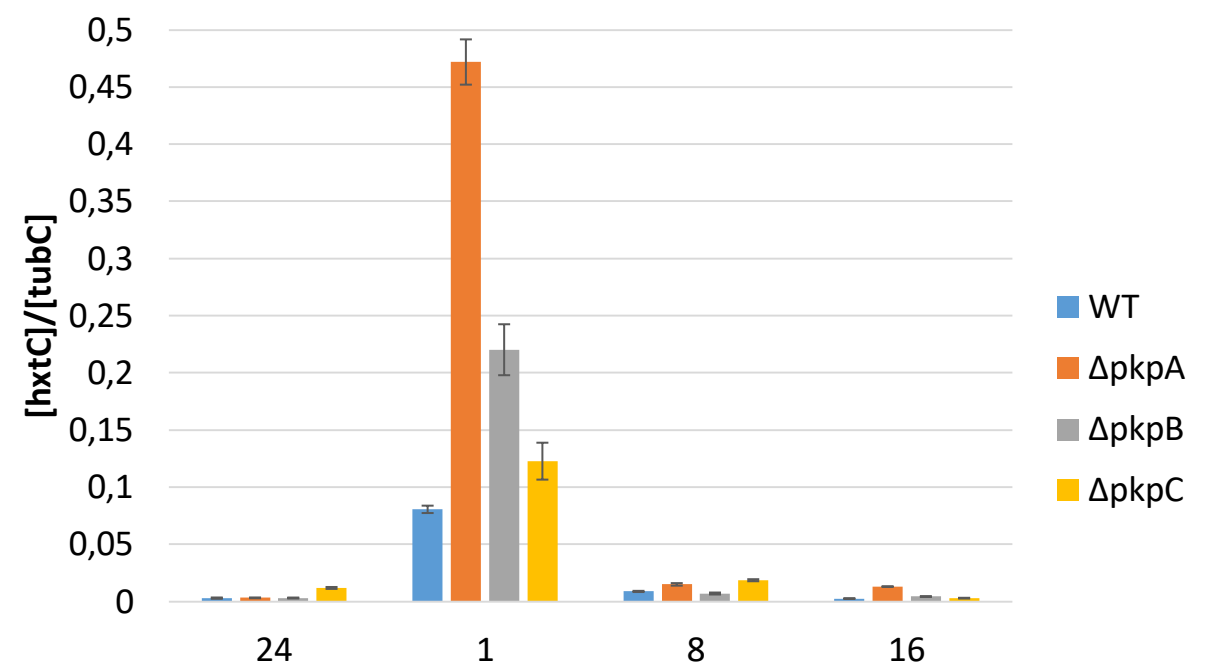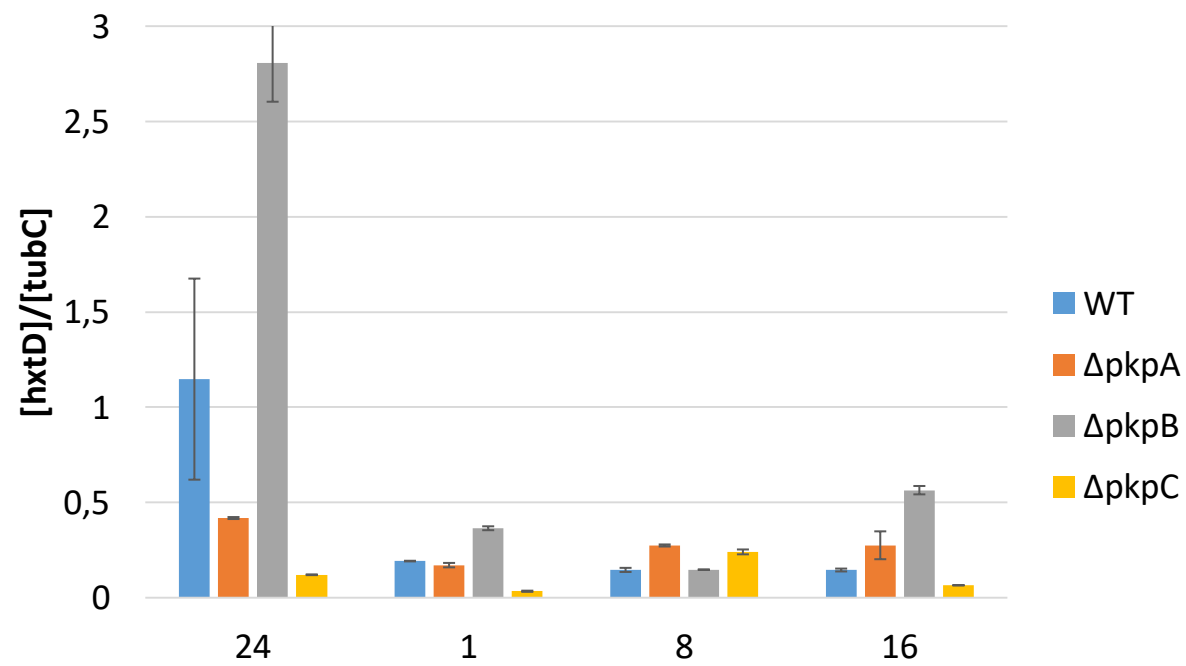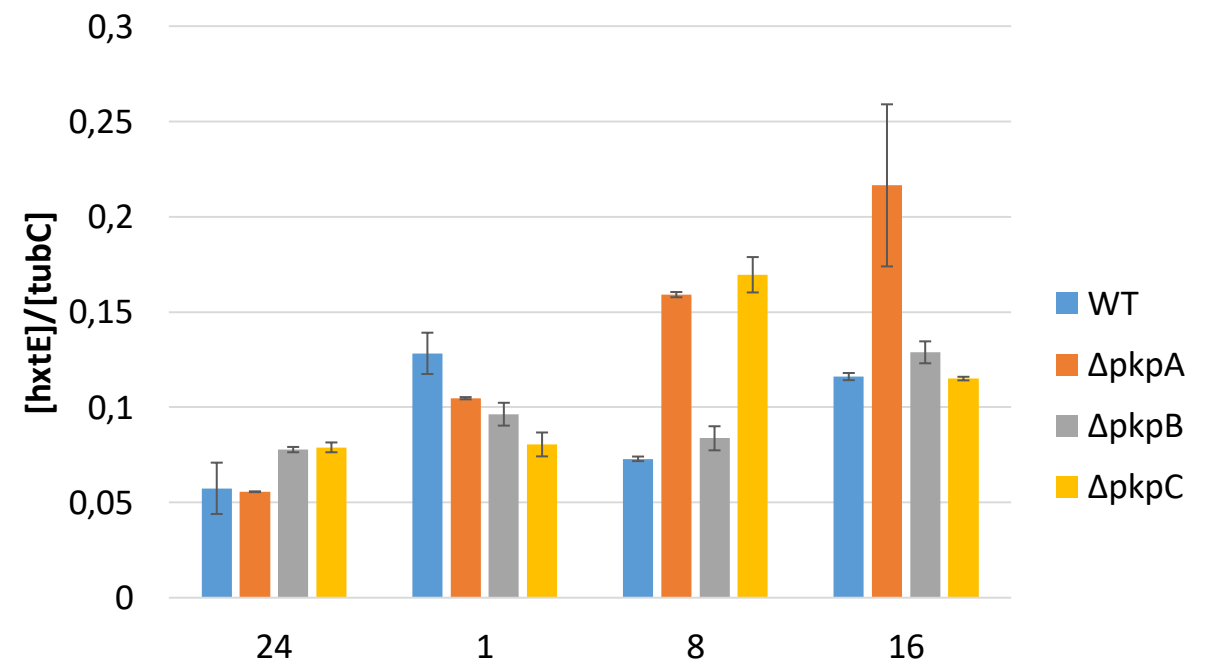

Time/condition: 24 h casamino acid then transfer to glucose for 1 h, 8 h and 16 h

Time/condition: 24 h casamino acid then transfer to glucose for 1 h, 8 h and 16 h

Time/condition: 24 h casamino acid then transfer to glucose for 1 h, 8 h and 16 h

Time/condition: 24 h casamino acid then transfer to glucose for 1 h, 8 h and 16 h
