# Supplementary material
Source: publisher figshare collection journal article supplement (https://gsajournals.figshare.com/articles/dataset/_/6241922)
Supplement: Supplementary file 2 [file 1]

A.

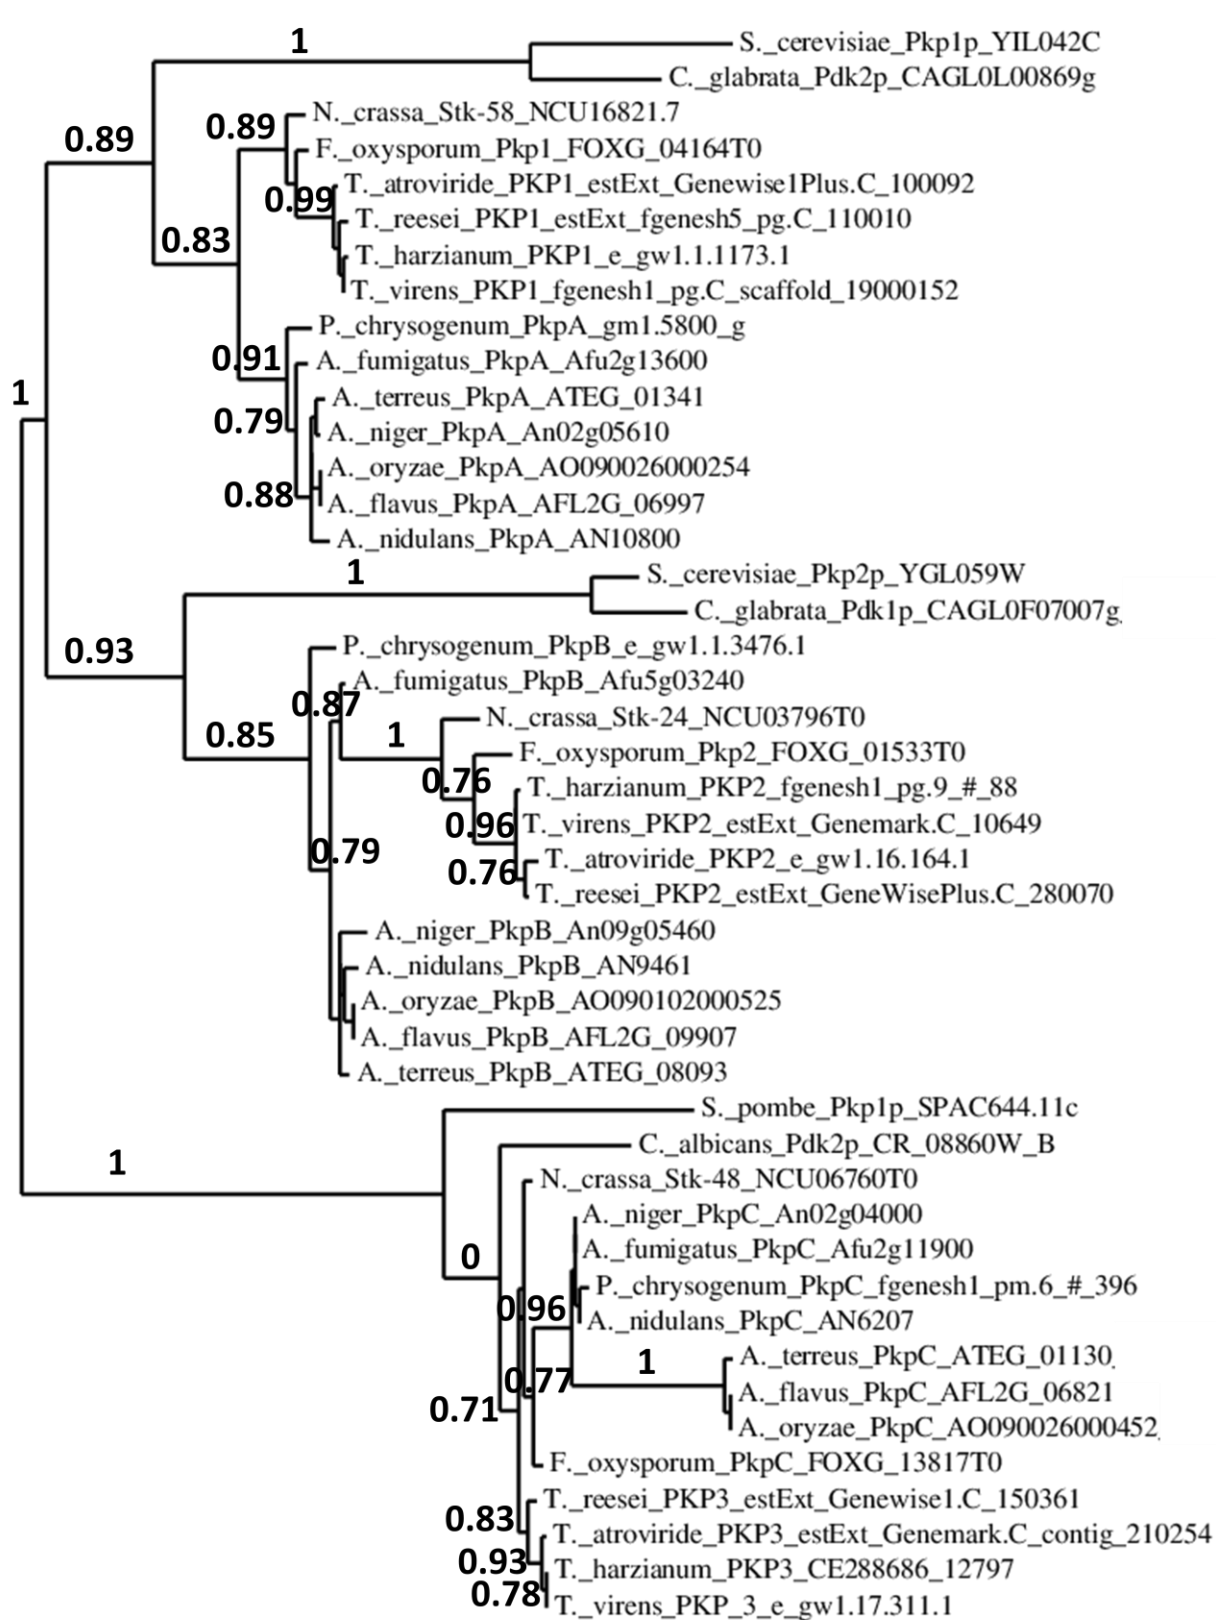

B.

|      |                                                                 |
|------|-----------------------------------------------------------------|
| PkpA | MAATIPFLTLSIGRDLRRSALRHRSRMVAARLFATSSHPKLTtTTATATTTQNLTPRANDE   |
| PkpB | -----MRAANNSSATTREIYVERQ---                                     |
| PkpC | -----MWKPSERLMDTIRHYASFP---                                     |
|      | .. * . .                                                        |
| PkpA | VARLAASRRRP[LTADLLKYGRPPLSKEALLASANFTLSLLPARLASRIEALRNLPFIVV    |
| PkpB | -----IRP[ISLRQLTFFGR-TLTESRLLSSANYVRTELPTRLAHLRLDIQKLPYAVV      |
| PkpC | -----ATG[VS LRQMVQFGD-RPSTGTLFRASQFLSEELPIRLAHRVQDLGELPDGLS     |
|      | ::* :: :* : * : ::* ** *** * . : : ** :                         |
| PkpA | ANPHVSKIYGNVHSLSTLLPWQKRQVTTL EEENQFAEVLADLVHTHSNTIPILARGFLE    |
| PkpB | ANPHFSLVYELYYKA FERFRTVP--EIRTLDDNDRFCDI LRKTLKEHLVVI PRLAMGVLE |
| PkpC | EMPSIKKVQDWYAQSFE EII NLP RPTLTQEVKARLLRPNRMTGGSKILAETTQNP SVRE |
|      | * .. : * : : : : : : . : : . . . . . *                          |
| PkpA | CRKYIDPAEVT RFLDTHLRARIGTRLIAEQHLALHFASRPAGDGS AEGREQPRKDAPPSN  |
| PkpB | CRGLLP AEAMDQFMNTLLRARISRRVIAEQHLALTETFN SPWHFPG---SQDRTDLN-AD  |
| PkpC | GQYRSAMTNGNGNGKAAAAARRYFVP SDDQGNWPP ELNDYNERFAKTLQQIKRRHDSVVT  |
|      | : . : . ** : * . . . * .                                        |
| PkpA | YIGVIDTALQPARIVRSCEE FVGEICELKYGVR--PRLEIHGQPDATFAHVPVHVEYI LT  |
| PkpB | FVGEVFLKCNAKEVVERCGKLVQDIIRQSSGSDKIPEISVQGHLDATFPYMLSHLEYI IG   |
| PkpC | TVAQGILEWKRKRQRLQIDSTIQSFLDRFYMSRIGIRMLIGQHIALTEQTHVRHPNYVGI    |
|      | :: . : . . : : : : : * * : *                                    |
| PkpA | EL LKNAFRAVIESGNEQEPIEVTIAAAPDVPGNHLQAHEPVTNGKPADALDTGAQSDSDV   |
| PkpB | EL LRNSIQAVSERYQGLNQT PPPIEVLICEAPQHVMRVSDQGG-----              |
| PkpC | ICPTKNVREVALEAIENARFVCE DYYGLFEAPKVQLVCKEDLNFMYVPGHLSHMLFETLK   |
|      | :: . : * . : .                                                  |
| PkpA | GFHVDTVVGTADANESIKFSTPSSQ----SITLRIRDRGGGISPDLVLPQIWSYSFTTFSD   |
| PkpB | -----GIPREILPYLWSFTK----GPHSKVRLENLGQVPAMAATLQELSVSSDIK         |
| PkpC | NSLRAVVERHGDKEAFPVTKVIIAEGKEDITIKVSDEGGGIPRS AIPLVWTYMYTTVEQ    |
|      | . . * : . : : . * . : : : .                                     |
| PkpA | LDMGEAGGIDALNTISSNSGQLSSIAGLGYGLPLSRAYAEYFGGS IAVQTLWGWDVYL     |
| PkpB | HADKETFRESSLDTLTSRPPDLR---LGIGLPM SRVYAEYWAGSLELHSLEGYGVDAFL    |
| PkpC | TPNLDPDFDKSDFKAPMAG-----FGYGLPISRLYARYFGGDLKLISMEGYGTDVYL       |
|      | :: . : . : * * * : * * * : * : : : * * * : *                    |
| PkpA | TLNGVGKVA-----                                                  |
| PkpB | QISKLGKNKEQVTTAAIDAV                                            |
| PkpC | HLNRLSSSSEPLQ-----                                              |
|      | :: . .                                                          |
