# Supplementary material
Source: publisher figshare collection journal article supplement (https://gsajournals.figshare.com/articles/dataset/_/6241922)
Supplement: Supplementary file 6 [file 1]

Table S1 - Strains used in this study.

| Strain                    | Genotype                                                                                                                                          | Reference                                 |
|---------------------------|---------------------------------------------------------------------------------------------------------------------------------------------------|-------------------------------------------|
| Wild-type (WT)            | <i>pyrG89; pyroA4; nkuA::argB</i>                                                                                                                 | Nayak et al., 2006                        |
| R21                       | <i>yA2 pabaA1</i>                                                                                                                                 | Andrade-Monteiro and Martinez-Rossi, 1999 |
| $\Delta pkpA$             | <i>pyrG89; wA3; argB2; <math>\Delta nkuA^{ku70}::argB</math> pyroA4; sE15 nirA14 chaA1 fwA1; <math>\Delta pkpA::pyrG^{Af}</math></i>              | De Souza et al., 2013                     |
| $\Delta pkpB$             | <i>pyroA4; nkuA::argB; <math>\Delta pkpB::pyrG^{Af}</math></i>                                                                                    | This work                                 |
| $\Delta pkpC$             | <i>pyrG89; wA3; argB2; <math>\Delta nkuA^{ku70}::argB</math> pyroA4; sE15 nirA14 chaA1 fwA1; <math>\Delta pkpC::pyrG^{Af}</math></i>              | De Souza et al., 2013                     |
| $\Delta pkpA \Delta pkpB$ | <i>yA2; pyrG89; wA3; argB2; <math>\Delta nkuA^{ku70}::argB</math>; sE15 nirA14 chaA1 fwA1; <math>\Delta pkpA</math>; <math>\Delta pkpB</math></i> | This work                                 |
| $\Delta pkpA \Delta pkpC$ | <i>yA2; pyrG89; wA3; argB2; <math>\Delta nkuA^{ku70}::argB</math>; sE15 nirA14 chaA1 fwA1; <math>\Delta pkpA</math>; <math>\Delta pkpC</math></i> | This work                                 |
| $\Delta pkpB \Delta pkpC$ | <i>yA2; pyrG89; wA3; argB2; <math>\Delta nkuA^{ku70}::argB</math>; sE15 nirA14 chaA1 fwA1; <math>\Delta pkpB</math>; <math>\Delta pkpC</math></i> | This work                                 |
| CreA::GFP $\Delta pkpA$   | <i>yA2; creA::GFP; pyrG89; nkuA::argB; wA3; argB2; <math>\Delta nkuA^{ku70}::argB</math>; sE15 nirA14 chaA1 fwA1; <math>\Delta pkpA</math></i>    | This work                                 |
| CreA::GFP $\Delta pkpB$   | <i>yA2; creA::GFP; pyrG89; nkuA::argB; wA3; argB2; <math>\Delta nkuA^{ku70}::argB</math>; sE15 nirA14 chaA1 fwA1; <math>\Delta pkpB</math></i>    | This work                                 |
| CreA::GFP $\Delta pkpC$   | <i>yA2; creA::GFP; pyrG89; nkuA::argB; wA3; argB2; <math>\Delta nkuA^{ku70}::argB</math>; sE15 nirA14 chaA1 fwA1; <math>\Delta pkpC</math></i>    | This work                                 |
| PkpA::GFP                 | <i>pyrG89; wA3; argB2; <math>\Delta nkuA^{ku70}::argB</math> pyroA4; sE15 nirA14 chaA1 fwA1; <i>pkpA::gfp::pyroA4</i></i>                         | This work                                 |
| PkpB::GFP                 | <i>pyrG89; wA3; argB2; <math>\Delta nkuA^{ku70}::argB</math> pyroA4; sE15 nirA14 chaA1 fwA1; <i>pkpB::gfp::pyroA4</i></i>                         | This work                                 |
| PkpC::GFP                 | <i>pyrG89; wA3; argB2; <math>\Delta nkuA^{ku70}::argB</math> pyroA4; sE15 nirA14 chaA1 fwA1; <i>pkpC::gfp::pyroA4</i></i>                         | This work                                 |
