# Supplementary material
Source: publisher figshare collection journal article supplement (https://gsajournals.figshare.com/articles/dataset/_/6241922)
Supplement: Supplementary file 7 [file 1]

Table S2 - Primers used in this study.

| Forward primer name | Sequence 5'-3'                                     | Reverse primer name | Sequence 5'-3'                                         |
|---------------------|----------------------------------------------------|---------------------|--------------------------------------------------------|
| 1                   | GTAACGCCAGGGTTTTCCCAGTCACGACGGGCAGGATAGATGTGCATTC  | 2                   | GCCTCCTCTCAGACAGAATGATGGCTGAACGCAAGAG                  |
| 3                   | GCATTGTTTGAGGCGAATTCTCGACTCTTATTTTGCCTAG           | 4                   | GCGGTTAACAATTTCTCTCTGGAAACAGCAAATATCGATGTCCTATTATACCCC |
| 5                   | GTAACGCCAGGGTTTTCCCAGTCACGACGGCAAAGGAGAA<br>GGGAGG | 6                   | CTTTACTCATTCCCCGTGTTCCAGCAACCTTCCCAACG                 |
| 7                   | CTGTCGATCATGTGGATGCTTCTAGGTAGTCTGCCCAG             | 8                   | GCGGTTAACAATTTCTCTCTGGAAACAGCTGGATGGGTGATCGGAG         |
| 9                   | GATCATGTGGATGCTTCGACTCTATTTTGCCTAG                 | 10                  | CTTTACTCATTCCCCGTGTTCCCTACGGCATCAATTGCTGC              |
| 11                  | GTAACGCCAGGGTTTTCCCAGTCACGACGTTTTCTCGGGCG<br>AAGG  | 12                  | CTTTACTCATTCCCCGTGTTCCCTTGGAGGGGGTTCCGAA               |
| 13                  | ATCATGTGGATGCTCAATTACCAGTCATGAGGGAT                | 14                  | GCGGTTAACAATTTCTCTCTGGAAACAGCGATGAACCAAATACCAGAAAGAT   |
| 15                  | GATGTAGGAAATGGCGAGTA                               | 16                  | CTGGCTCATGTGCTTGT                                      |
| 17                  | GGTCTGGTCTTTGGCTC                                  | 18                  | ACTGTAGTCACAACACTGTC                                   |
| 19                  | TGGTATCATGGTTGTTGGGTC                              | 20                  | AGCATCCACATGATCGACAG                                   |
|                     |                                                    | 21                  | ACAACCATGATACCAACGCCAAGCTTGCTATG                       |
| 22                  | GAGAGTGGAAACGAGCAG                                 | 23                  | CAGAAAACGTGGTGAAGC                                     |
| 24                  | CTCAACCAAACACCACCC                                 | 25                  | GCCCTATCCCCAGCC                                        |
| 26                  | GAAGCCCCAAAGGTCC                                   | 27                  | ATGCCACCACCTTCATC                                      |
| 28                  | AACCTGAGCGGCTATGTGAT                               | 29                  | AACAGTGGTGGAGGCAGTCT                                   |
