# Supplementary material
Source: publisher figshare collection journal article supplement (https://gsajournals.figshare.com/articles/dataset/_/6241922)

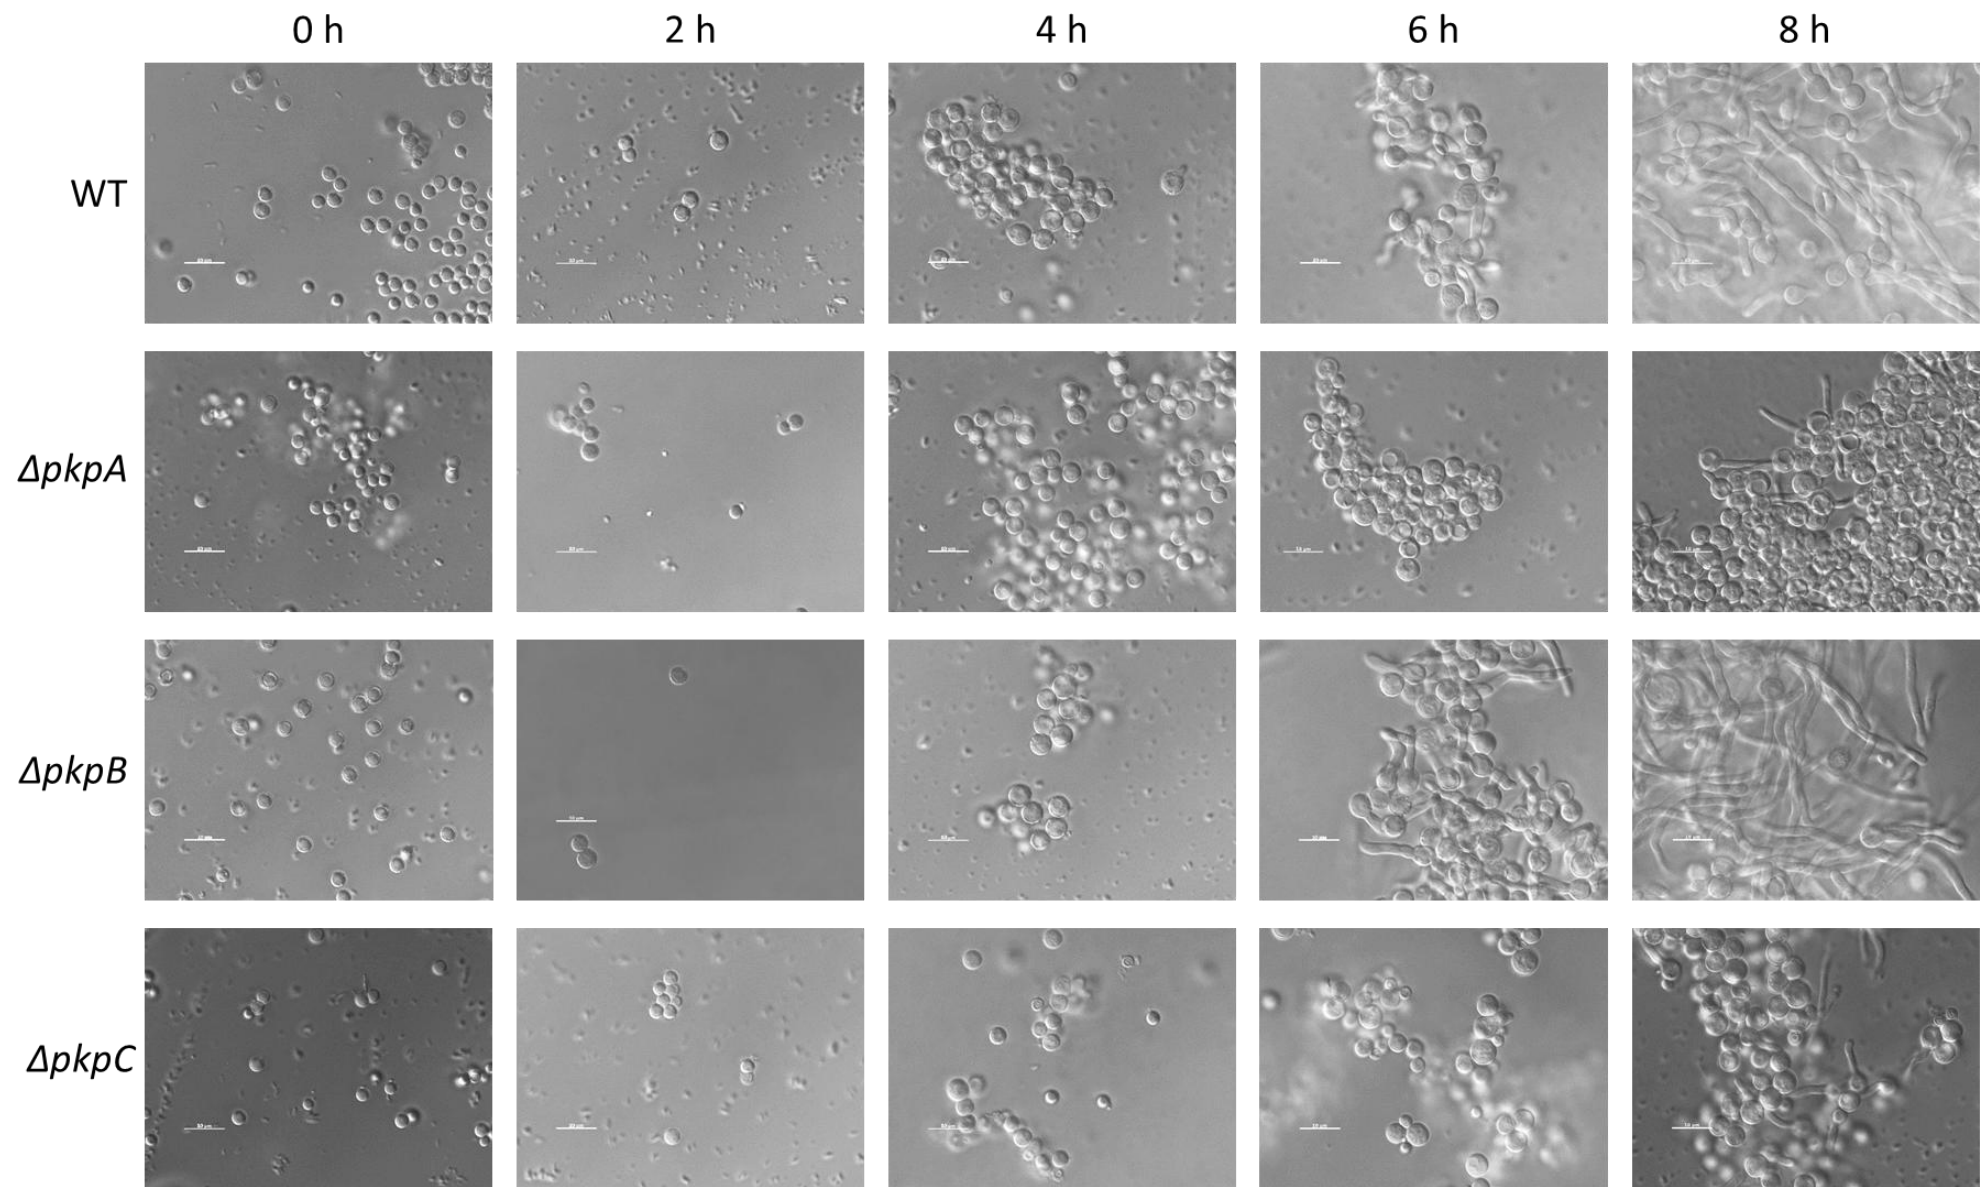

Supplement: Supplementary file 3 [file 1]

**A.**

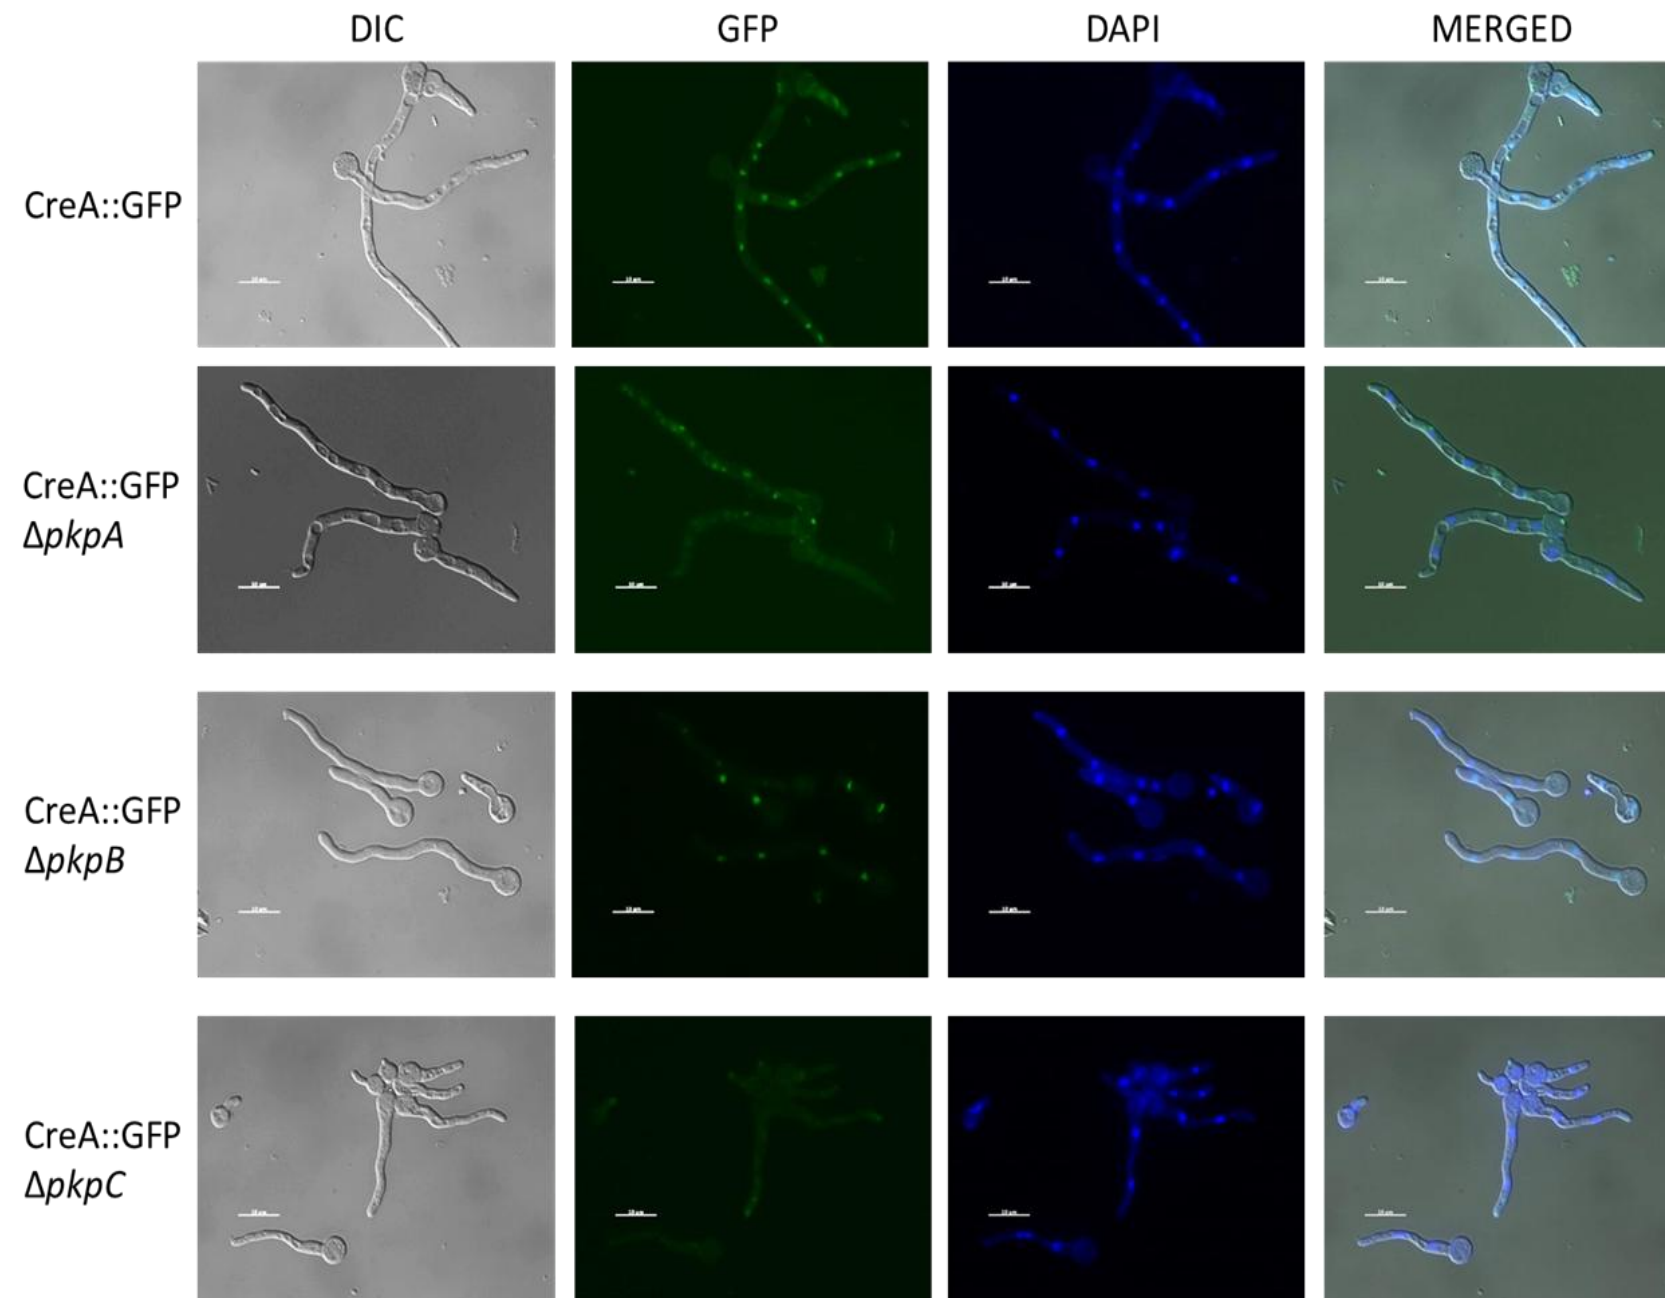

**B.**

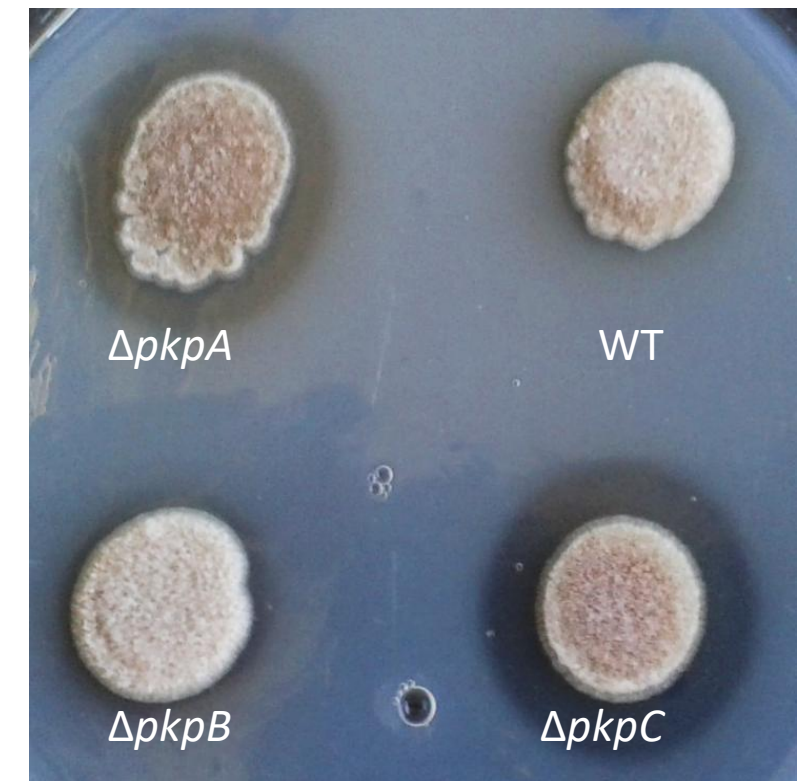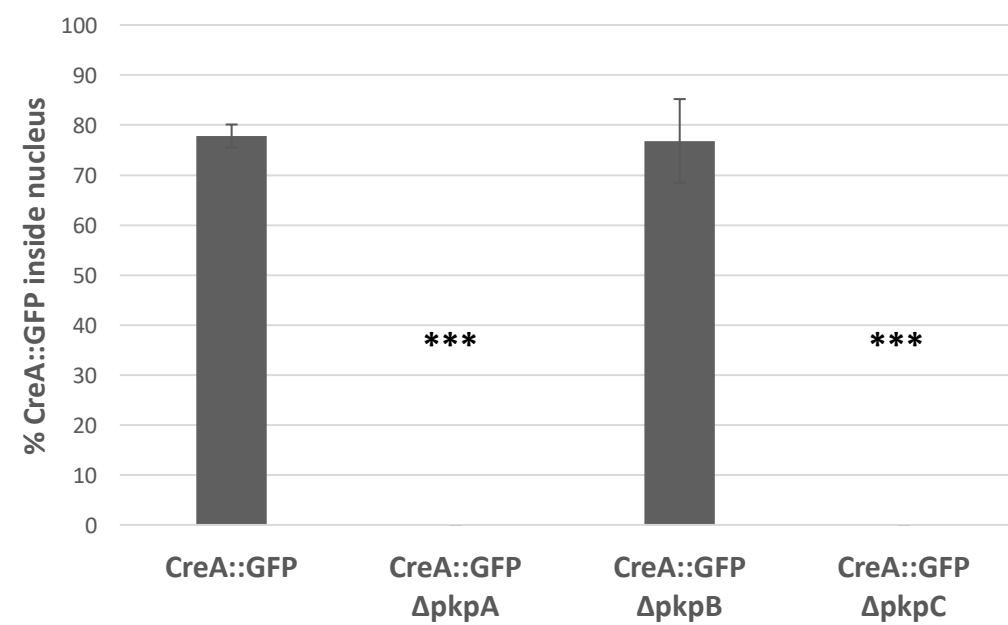

Supplement: Supplementary file 4 [file 1]

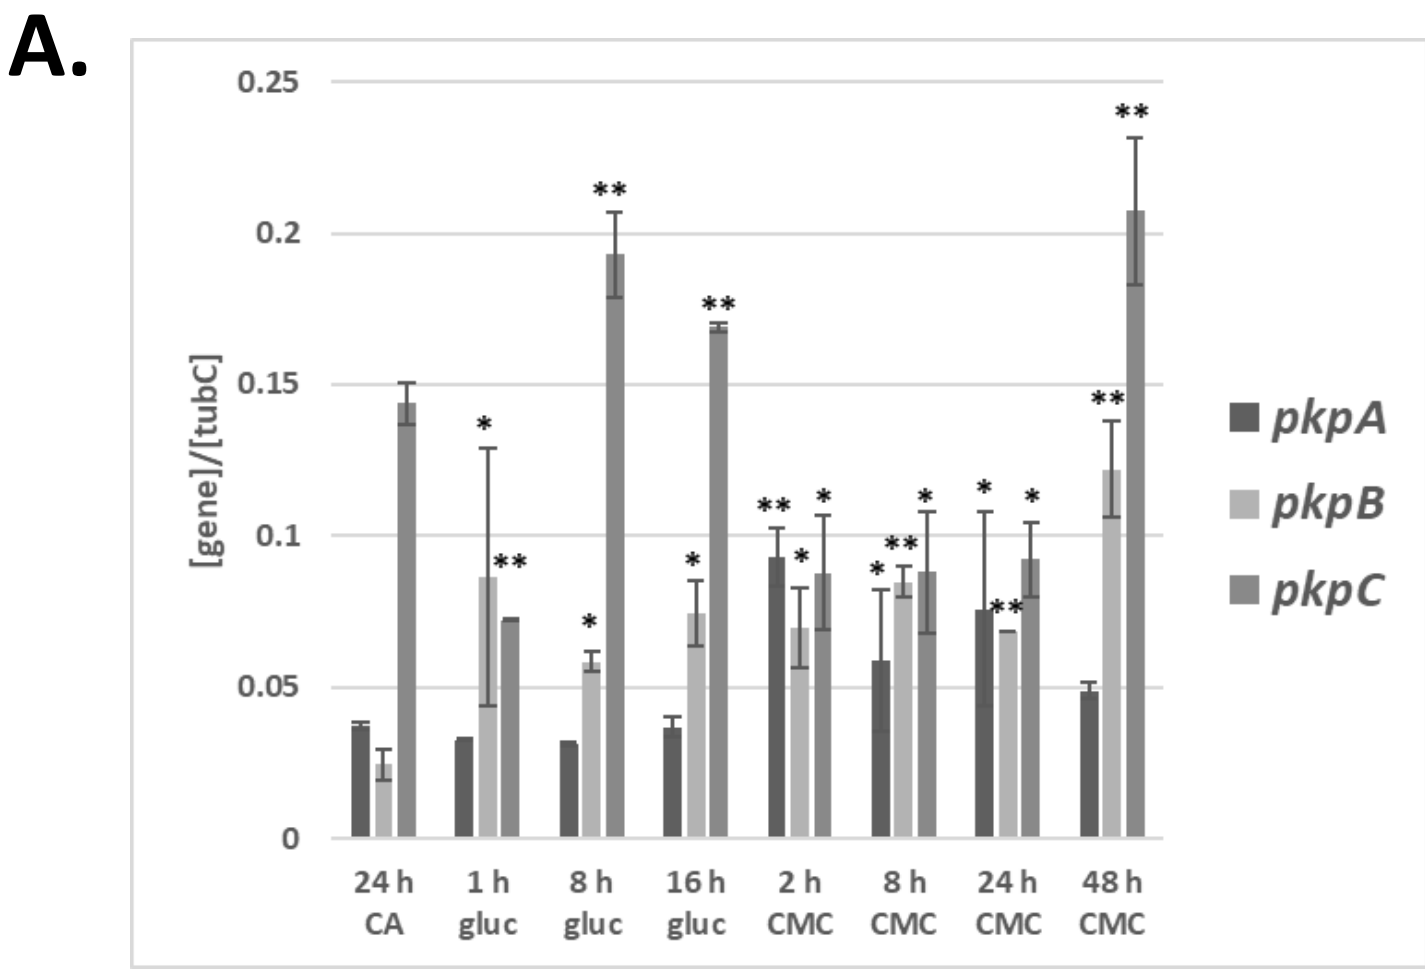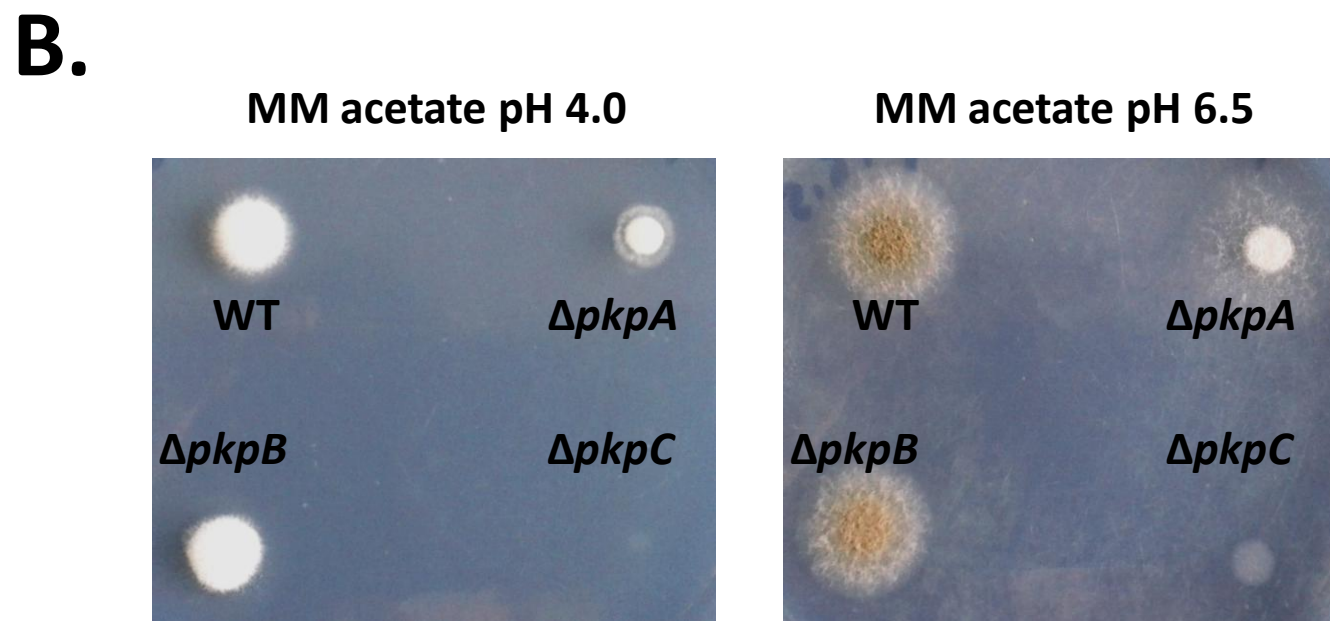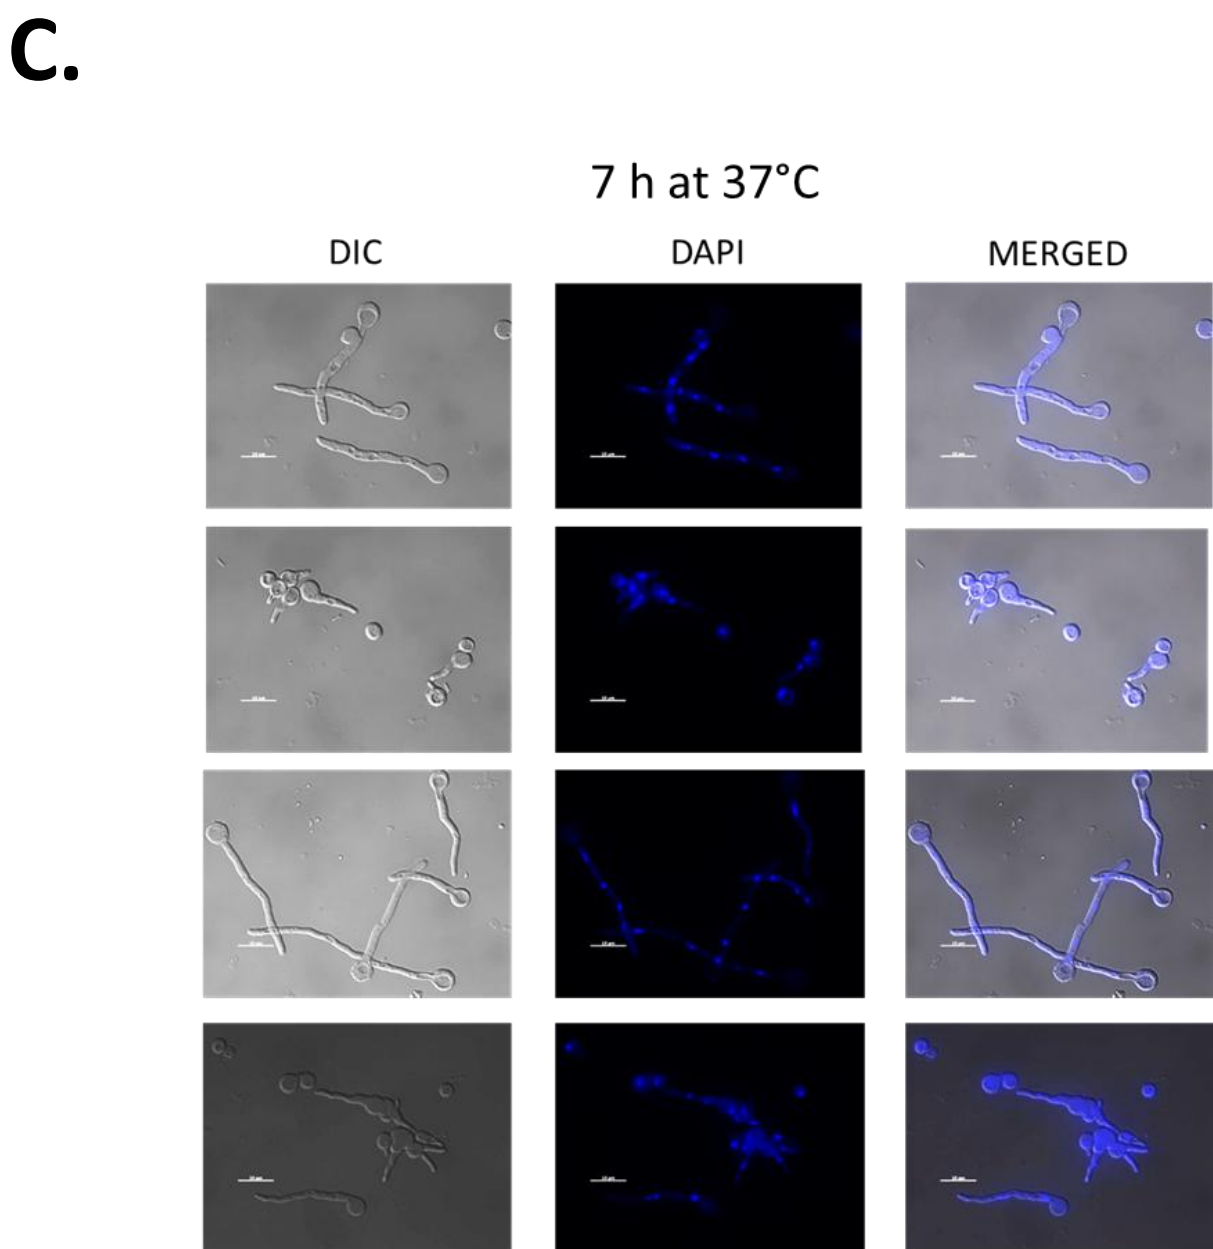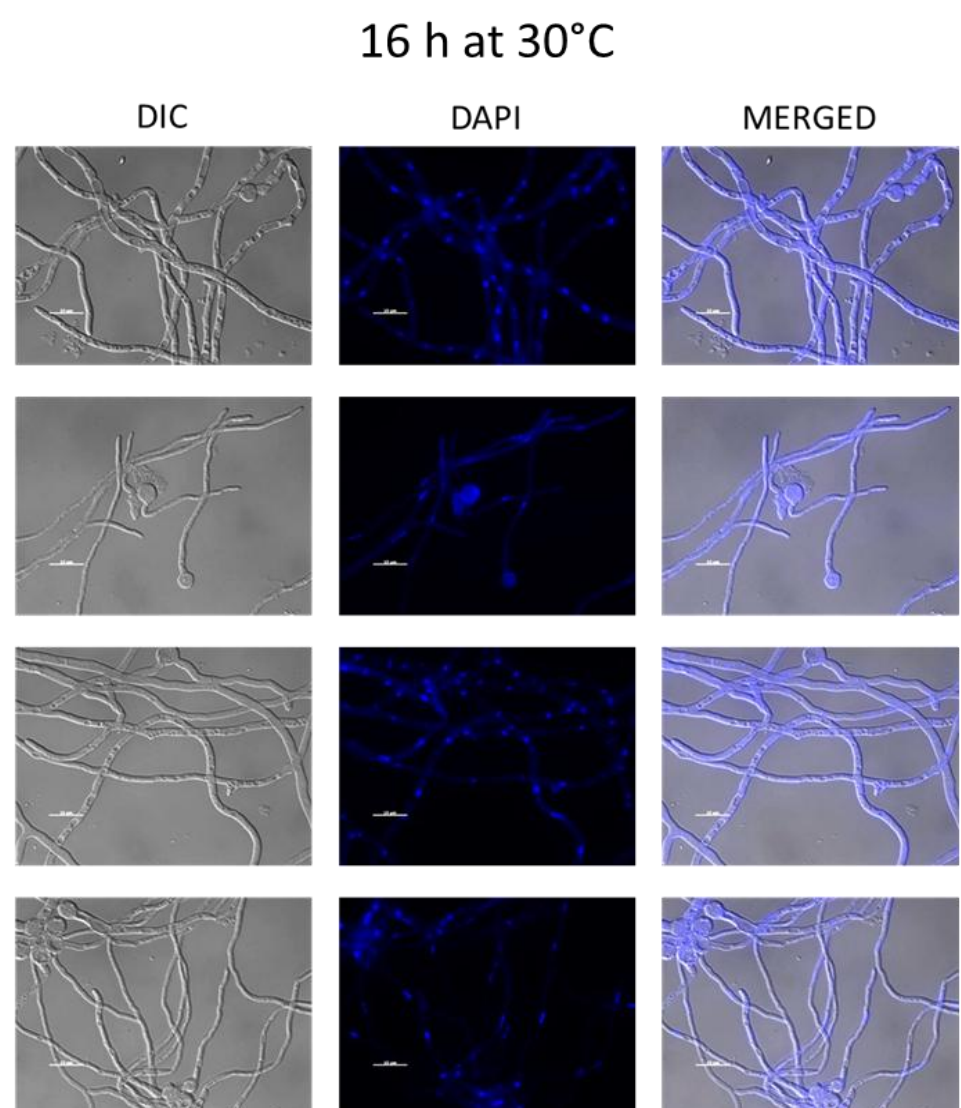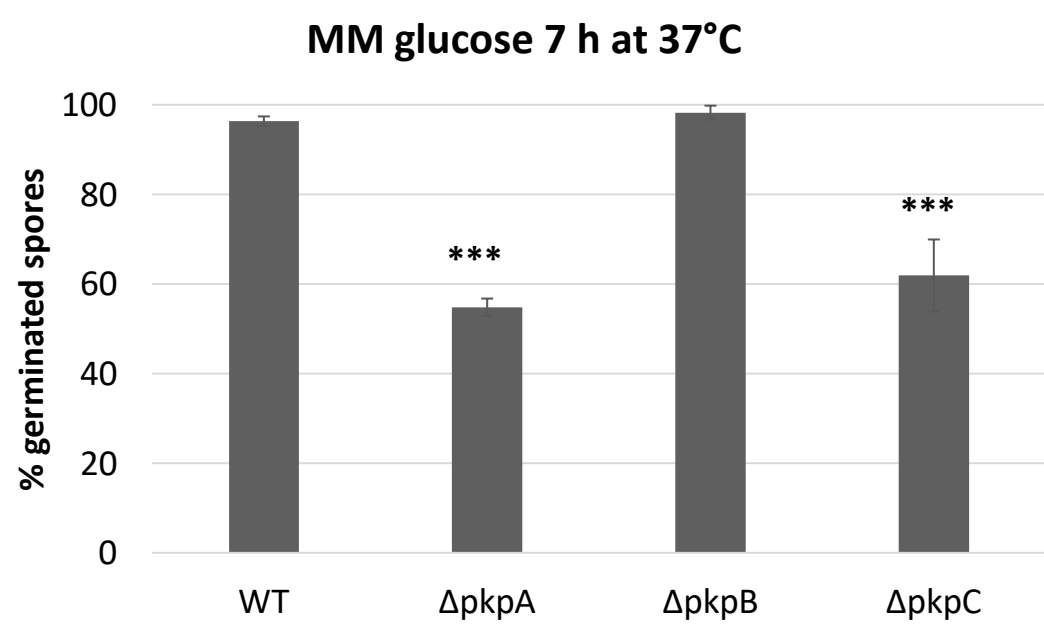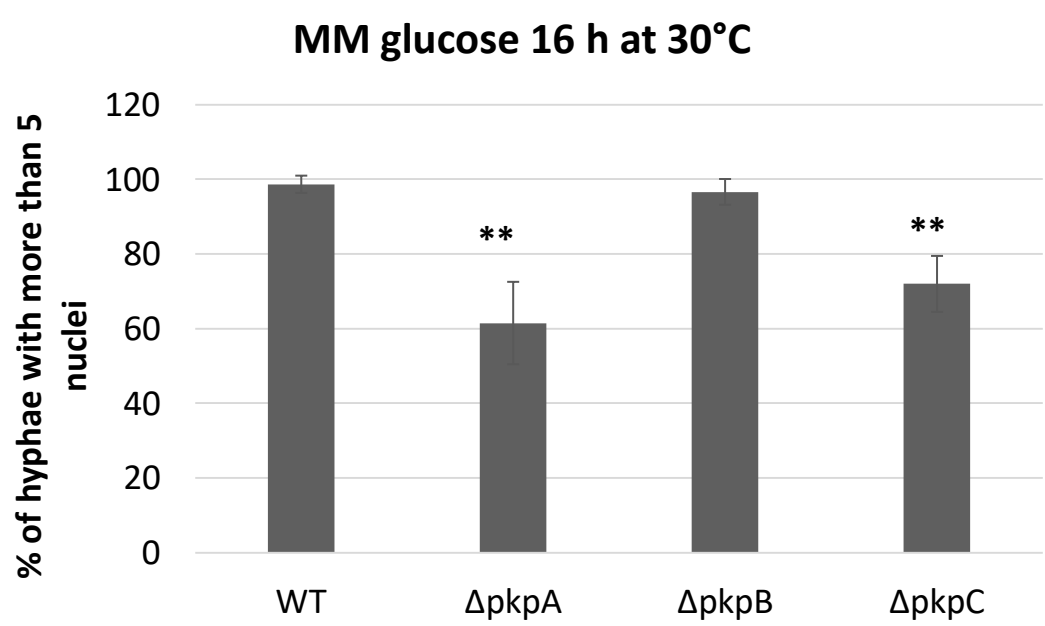

Supplement: Supplementary file 5 [file 1]
